# Supplementary material
Source: publisher figshare collection journal article supplement (https://gsajournals.figshare.com/ndownloader/files/22851422)
Supplement: Supplementary file 1 [file 22851422]

**Table S2. Weighted genome-wide averages of pairwise FST estimates for all populations but with genomic areas identified as part of the haplotype structure omitted.**

| **Population** | **Inari** | **Kolari** | **Kalvia** | **Punkaharju** | **Kalsnava** | **Radom** | **Ust-Chilma** | **Megdurechensk** | **Ust-Kulom** | **Penzenskaja** | **Volgogradskaja** |
| --- | --- | --- | --- | --- | --- | --- | --- | --- | --- | --- | --- |
| **Kolari** | 0.014 |  |  |  |  |  |  |  |  |  |  |
| **Kalvia** | 0.000 | 0.016 |  |  |  |  |  |  |  |  |  |
| **Punkaharju** | 0.000 | 0.017 | 0.005 |  |  |  |  |  |  |  |  |
| **Kalsnava** | 0.019 | 0.019 | 0.023 | 0.020 |  |  |  |  |  |  |  |
| **Radom** | 0.002 | 0.020 | 0.005 | 0.007 | 0.015 |  |  |  |  |  |  |
| **Ust-Chilma** | 0.010 | 0.022 | 0.013 | 0.010 | 0.034 | 0.018 |  |  |  |  |  |
| **Megdurechensk** | 0.008 | 0.020 | 0.011 | 0.009 | 0.029 | 0.016 | 0.001 |  |  |  |  |
| **Ust-Kulom** | 0.056 | 0.040 | 0.056 | 0.057 | 0.041 | 0.045 | 0.050 | 0.048 |  |  |  |
| **Penzenskaja** | 0.008 | 0.023 | 0.011 | 0.013 | 0.033 | 0.015 | 0.009 | 0.009 | 0.056 |  |  |
| **Volgogradskaja** | 0.000 | 0.017 | 0.004 | 0.005 | 0.022 | 0.007 | 0.010 | 0.006 | 0.056 | 0.001 |  |
| **Baza** | 0.068 | 0.081 | 0.073 | 0.071 | 0.077 | 0.065 | 0.083 | 0.077 | 0.113 | 0.081 | 0.072 |
